# Supplementary material for: A Critical Role of the IL-22–IL-22 Binding Protein Axis in Hepatocellular Carcinoma
Source: MDPI journal article supplement (doi:10.3390/cancers14246019), 2022-12-07
Supplement: s1 [file s1]

## Supplementary Figures

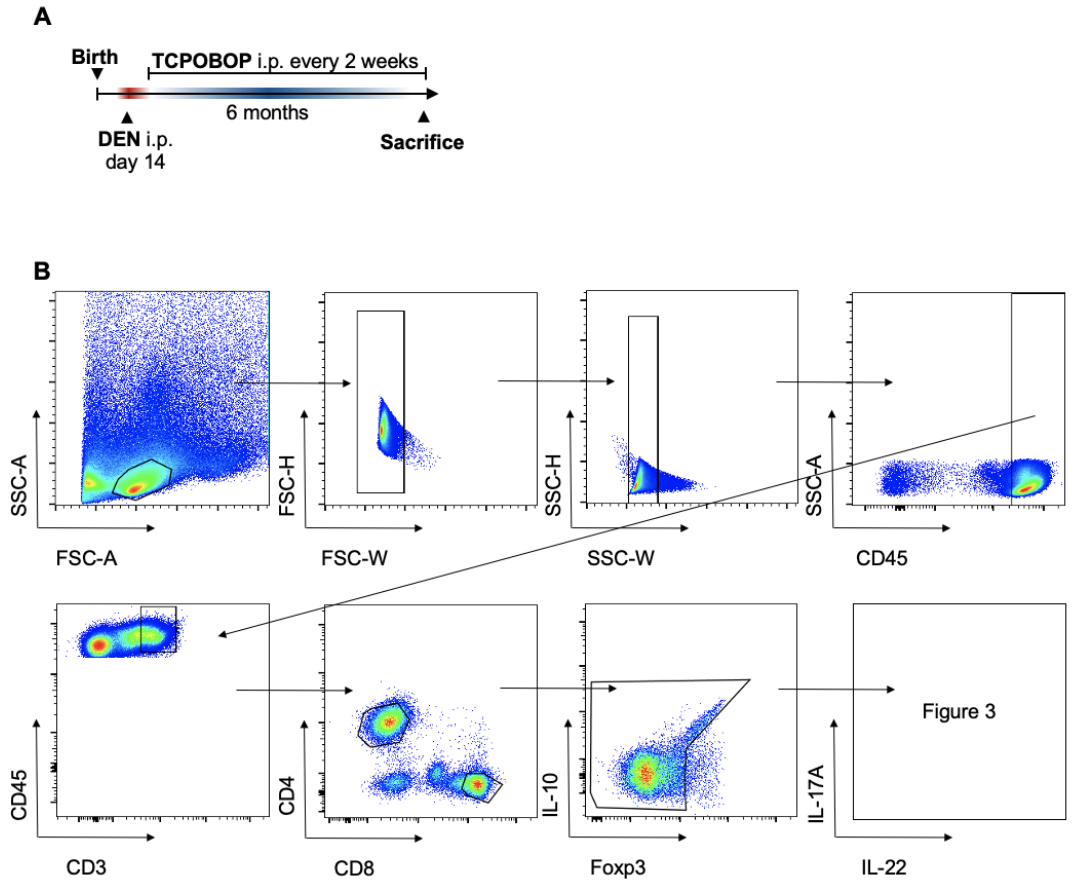

**Supplementary Figure S1.** A gating strategy for leucocyte analysis with FACS in a chemical HCC model. (a) Schematic timeline describing chemical HCC induction with DEN and TCPOBOP in mice; (b) Representative dot plots displaying the used gating strategy.

## Supplementary Tables

**Table S1.** Fluorochrome-labelled antibodies used for FACS.

| Epitope | Origin | Clone  | Fluoro-chrome | Dilution | Manufacturer |
|---------|--------|--------|---------------|----------|--------------|
| CD45.2  | mouse  | 104    | BV786         | 1:200    | Biolegend    |
| CD45.2  | mouse  | 104    | Pe-Cy7        | 1:200    | Biolegend    |
| CD3     | rat    | 17A2   | BV700         | 1:100    | BioLegend    |
| CD3     | rat    | 17A2   | FITC          | 1:200    | BioLegend    |
| CD3     | rat    | 17A2   | PE            | 1:200    | BioLegend    |
| CD4     | rat    | GK1.5  | BUV395        | 1:200    | BioLegend    |
| CD4     | rat    | GK1.5  | APC           | 1:200    | BioLegend    |
| CD4     | rat    | GK1.5  | BV605         | 1:200    | BioLegend    |
| CD8     | rat    | 53-6.7 | Pe-Cy7        | 1:200    | BioLegend    |

|       |         |             |         |       |                    |
|-------|---------|-------------|---------|-------|--------------------|
| CD8   | rat     | 53-6.7      | APC     | 1:200 | BioLegend          |
| CD11b | rat     | M1/70       | APC-Cy7 | 1:200 | BioLegend          |
| CD11c | hamster | HL3         | FITC    | 1:200 | BD Biosci-<br>ence |
| Ly6G  | rat     | 1A8         | BV421   | 1:200 | BD Biosci-<br>ence |
| Ly6C  | rat     | AL-21       | PE      | 1:600 | BD Biosci-<br>ence |
| MHCII | rat     | M5/114.15.2 | PerCP   | 1:400 | BioLegend          |

**Table S2.** Probes used for murine RNA quantification via qPCR.

| Gene          | Probe name    |
|---------------|---------------|
| <i>Cebpd</i>  | Mm00843434_s1 |
| <i>Fga</i>    | Mm00802584_m1 |
| <i>Fgb</i>    | Mm00805336_m1 |
| <i>Hprt1</i>  | Mm03024075_m1 |
| <i>Il22</i>   | Mm01226722_g1 |
| <i>Il22bp</i> | Mm01192969_m1 |
| <i>Il33</i>   | Mm00505403_m1 |
| <i>Steap4</i> | Mm00475405_m1 |

**Table S3.** Probes used for human RNA quantification via qPCR.

| Gene          | Probe name    |
|---------------|---------------|
| <i>CEPBD</i>  | Hs00270931_s1 |
| <i>FGA</i>    | Hs00241027_m1 |
| <i>FGB</i>    | Hs00905942_m1 |
| <i>HPRT1</i>  | Hs02800695_m1 |
| <i>IL22</i>   | Hs01574154_m1 |
| <i>IL33</i>   | Hs00369211_m1 |
| <i>STEAP4</i> | Hs01026584_m1 |
